# Supplementary material for: Enhancing the quality of fermented plant leaves: the role of metabolite signatures and associated fungi
Source: PubMed Central journal article supplement (PMC10987691; doi:10.3389/fpls.2024.1335850), 2024-03-20
Supplement: DataSheet_1.pdf [file DataSheet_1.pdf]

## Supplementary Information

### Metabolite signatures and associated fungi improve fermented plant leaves quality

Lei Xing<sup>1 a b c</sup>, Jinshan Lei<sup>a b c</sup>, Jie Liu<sup>a b c</sup>, Zhen Yang<sup>a b c</sup>, Zhishun Chai<sup>a b c</sup>, Wen Cai<sup>a b c</sup>, Min Zhang

<sup>d</sup>, Yujie Wang<sup>d \*</sup> and Huaqun Yin<sup>d e \*</sup>

<sup>a</sup> *China Tobacco Sichuan Industrial Co., Ltd, Chengdu, 610100, China*

<sup>b</sup> *Cigar Fermentation Technology Key Laboratory of China Tobacco (China Tobacco Sichuan Industrial Co.,Ltd.)*

<sup>c</sup> *Industrial Efficient Utilization of Domestic Cigar Tobacco Key Laboratory of Sichuan Province*

<sup>d</sup> *School of Minerals Processing and Bioengineering, Central South University, Changsha, 410083, China*

<sup>e</sup> *Key Laboratory of Biometallurgy, Ministry of Education, Changsha, 410083, China*

\* Corresponding author: Yujie Wang, Huaqun Yin

E-mail address: [yujie\\_W@163.com](mailto:yujie_W@163.com); [yinhuaqun\\_cs@sina.com](mailto:yinhuaqun_cs@sina.com)

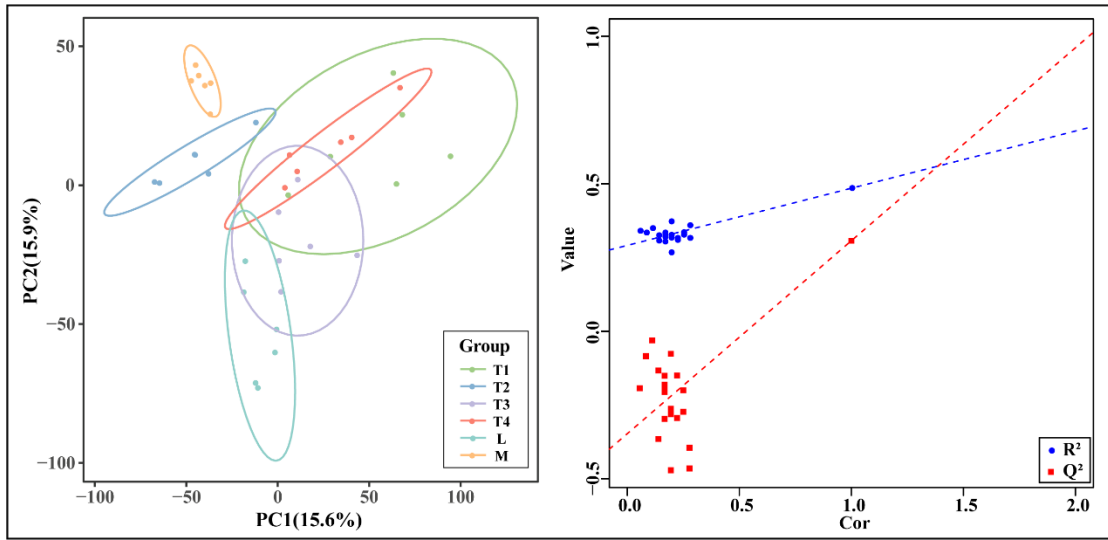

**Fig S1. PLS-DA scores plot of differential metabolites.**

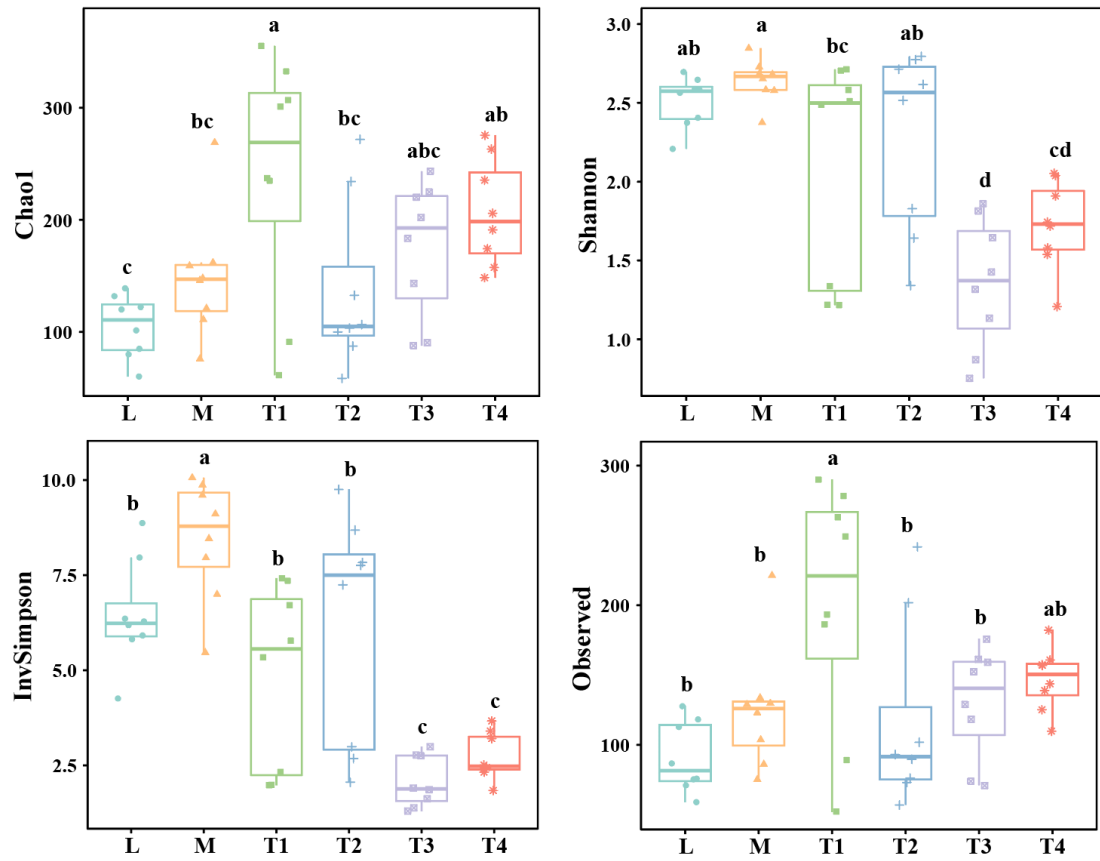

**Fig S2. Alpha-diversity of cigar tobacco fungal communities.** Different letters indicate significant difference between fermentation statuses ( $P < 0.05$ , ANOVA).

**Table S1.** Flavor components of the two cigar samples (L and M).

| Indicators            |               | L | M |
|-----------------------|---------------|---|---|
| Aroma characteristics | Bean scent    | 3 | 2 |
|                       | Woody scent   | 2 | 1 |
|                       | Burnt sweet   | 3 | 1 |
|                       | Pure scent    | 0 | 1 |
|                       | Smoky aroma   | 1 | 0 |
|                       | Creamy        | 1 | 0 |
|                       | Baked         | 2 | 0 |
| Offensive odors       | Scorched odor | 0 | 1 |

(Score 0~5)

**Table S2.** Sensory characteristics of the two cigar samples (L and M).

| Indicators                                                         |                 | L   | M |
|--------------------------------------------------------------------|-----------------|-----|---|
| The mellowness of Aroma                                            | Mellowness      | 6   | 5 |
|                                                                    | Richness        | 7   | 6 |
|                                                                    | Matureness      | 7   | 5 |
| The mellowness of smoke                                            | Plumpness       | 6   | 5 |
|                                                                    | Fluentness      | 6   | 5 |
|                                                                    | Smoothness      | 5   | 4 |
|                                                                    | Sweetness       | 6   | 5 |
| The refined purity of aftertaste                                   | Stimulating     | 6   | 6 |
|                                                                    | Cleanliness     | 6   | 6 |
|                                                                    | Aftertaste      | 5   | 5 |
|                                                                    | Combustibility  | 6   | 7 |
| Combustion characteristics                                         | Grey            | 6   | 6 |
|                                                                    | Ash coagulation | 6   | 6 |
| The harmonization of perceptible combustion and inhalation indices | Balancing       | 6.5 | 5 |

(Score 0~9)

**Table S3.** Statistical table of metabolite identification

| mode | All   | Metabolite | HMDB | KEGG |
|------|-------|------------|------|------|
| pos  | 15343 | 8451       | 2062 | 2396 |
| neg  | 5103  | 2676       | 639  | 736  |

**Table S4** Topological properties of cigar leaves community networks in different groups.

| Network Indexes            | T1                                | T2                          | T3                             | T4                              | L                          | M                           |
|----------------------------|-----------------------------------|-----------------------------|--------------------------------|---------------------------------|----------------------------|-----------------------------|
| Number of nodes            | 175                               | 70                          | 98                             | 117                             | 60                         | 87                          |
| Number of edges            | 5117                              | 352                         | 638                            | 1048                            | 164                        | 511                         |
| Avg. number of neighbors   | 58.480                            | 10.057                      | 13.020                         | 17.915                          | 5.467                      | 11.747                      |
| Network diameter           | 4                                 | 6                           | 5                              | 5                               | 6                          | 4                           |
| Network radius             | 3                                 | 4                           | 3                              | 3                               | 4                          | 3                           |
| Characteristic path length | 1.843                             | 2.536                       | 2.381                          | 2.248                           | 3.035                      | 2.316                       |
| Clustering coefficient     | 0.702                             | 0.509                       | 0.501                          | 0.498                           | 0.406                      | 0.442                       |
| Density                    | 0.336                             | 0.146                       | 0.134                          | 0.154                           | 0.093                      | 0.137                       |
| Heterogeneity              | 0.562                             | 0.466                       | 0.398                          | 0.520                           | 0.368                      | 0.386                       |
| Centralization             | 0.305                             | 0.163                       | 0.095                          | 0.202                           | 0.079                      | 0.122                       |
| Maximal degree             | 111                               | 21                          | 22                             | 41                              | 8                          | 22                          |
| Nodes with max degree      | OTU63( <i>Phaeosphaeriopsis</i> ) | OTU42 ( <i>Meyerozyma</i> ) | OTU271 ( <i>Cryptococcus</i> ) | OTU116 ( <i>Phaeosphaeria</i> ) | OTU3 1 ( <i>Wallenia</i> ) | OTU3 0 ( <i>Pleospora</i> ) |
